# Supplementary material
Source: Springer Nature journal article supplement (https://www.springermedizin.de/resource/supplementary/12950_2011_234_MOESM3_ESM.pdf/9558264)

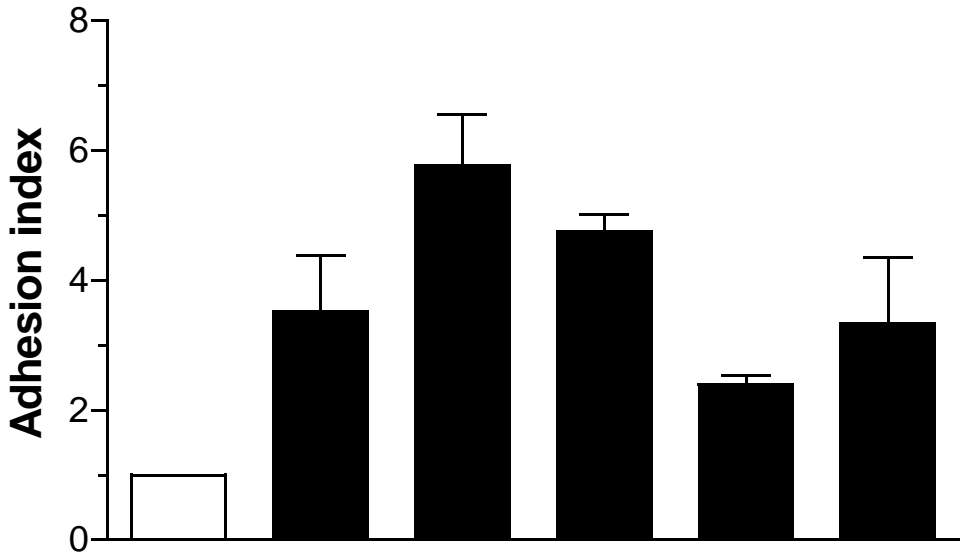

|               |   |   |   |   |   |   |
|---------------|---|---|---|---|---|---|
| TNF- $\alpha$ | - | + | - | + | - | + |
| CHE           | - | - | + | + | - | - |
| Alk           | - | - | - | - | + | + |

Supplement: MOESM3 [file 9558264]
